# Supplementary material
Source: PubMed Central journal article supplement (PMC3664995)
Supplement: neo1506_0631SD1.pdf [file neo1506_0631SD1.pdf]

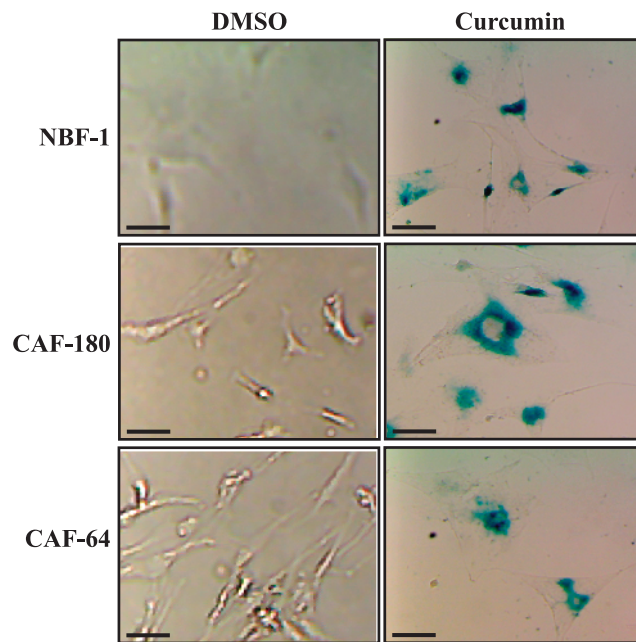

**Figure W1.** Curcumin triggers senescence in different breast stromal fibroblasts. Cells were either sham-treated (DMSO) or challenged with curcumin (10  $\mu$ M) for 24 hours, and then SA- $\beta$ -gal activity was assessed (NBF, normal breast fibroblast). Scale bars represent 50  $\mu$ m.
